# Supplementary material
Source: PubMed Central journal article supplement (PMC4442637)
Supplement: NIHMS687755-supplement-Supplemental.pdf [file NIHMS687755-supplement-Supplemental.pdf]

## Supplementary Materials for

### **Exome Sequencing Can Improve Diagnosis and Alter Patient Management**

Tracy J. Dixon-Salazar, Jennifer L. Silhavy, Nitin Udpa, Jana Schroth, Stephanie Bielas, Ashleigh E. Schaffer, Jesus Olvera, Vineet Bafna, Maha S. Zaki, Ghada H. Abdel-Salam, Lobna A. Mansour, Laila Selim, Sawsan Abdel-Hadi, Naima Marzouki, Tawfeg Ben-Omran, Nouriya A. Al-Saana, F. Müjgan Sonmez, Figen Celep, Matloob Azam, Kiley J. Hill, Adrienne Collazo, Ali G. Fenstermaker, Gaia Novarino, Naiara Akizu, Kiran V. Garimella, Carrie Sougnez, Carsten Russ, Stacey B. Gabriel, Joseph G. Gleeson\*

\*To whom correspondence should be addressed. E-mail: [jogleeson@ucsd.edu](mailto:jogleeson@ucsd.edu)

Published 13 June 2012, *Sci. Transl. Med.* **4**, 138ra78 (2012)  
DOI: 10.1126/scitranslmed.3003544

#### **The PDF file includes:**

- Fig. S1. Genetic data for family 890.
- Fig. S2. Genetic data for family 951.
- Fig. S3. Genetic data for family 1002.
- Fig. S4. Genetic data for family 1004.
- Fig. S5. Genetic data for family 702.
- Fig. S6. Genetic data for family 928.
- Fig. S7. Genetic data for family 992.
- Fig. S8. Genetic data for family 995.
- Fig. S9. Genetic data for family 1409.
- Fig. S10. Genetic data for family 1436.
- Table S1. Estimated variants to be considered as causative from whole-exome sequencing are greatly reduced in recessive disease with documented consanguinity.
- Table S2. Number of variants identified in each family at each step of the variant filtering and prioritization pipeline.

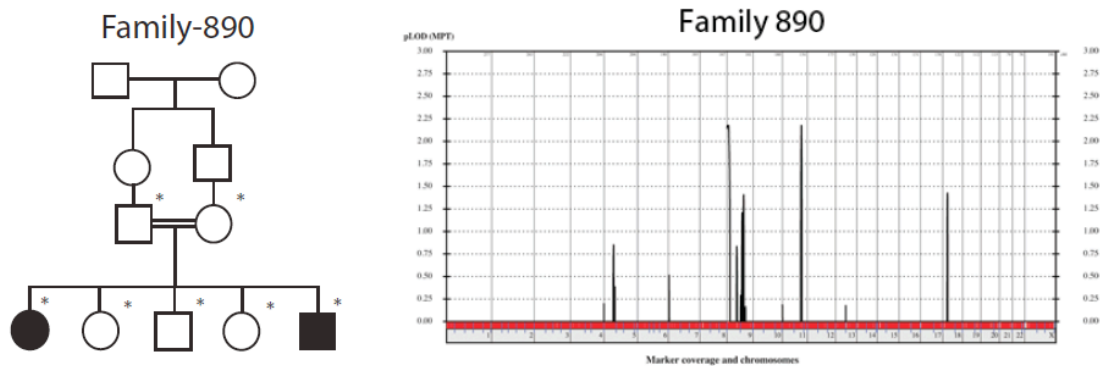

| Chr | Position | RefNT   | AltNT | AA Change      | Prediction | Conserv | Gene            | Gene Description                                 | Segregates in Family | Present in 200 Controls |
|-----|----------|---------|-------|----------------|------------|---------|-----------------|--------------------------------------------------|----------------------|-------------------------|
| 9   | 2635016  | GTTACAA | -     | p.G1246fsX1305 | DAMAGING   | N/A     | <i>VLDLR</i>    | Very low density lipoprotein receptor            | Yes                  | No                      |
| 9   | 8487250  | T       | C     | p.T781A        | TOLERATED  | 4.38    | <i>PTPRD</i>    | Receptor-type-tyrosine-protein-phosphatase delta | No                   | -                       |
| 9   | 107371   | C       | G     | p.G250A        | TOLERATED  | 1.21    | <i>FOXD4</i>    | Forkhead box protein D4                          | -                    | -                       |
| 9   | 107428   | G       | C     | p.P231R        | TOLERATED  | 1.22    | <i>FOXD4</i>    | Forkhead box protein D4                          | -                    | -                       |
| 9   | 107696   | G       | A     | p.R142C        | TOLERATED  | 1.85    | <i>FOXD4</i>    | Forkhead box protein D4                          | -                    | -                       |
| 9   | 204804   | A       | G     | p.V198A        | TOLERATED  | 0.55    | <i>C9orf66</i>  | Uncharacterized protein C9orf66                  | -                    | -                       |
| 9   | 7789653  | G       | T     | p.P28T         | TOLERATED  | 2.27    | <i>C9orf123</i> | Transmembrane protein C9orf123                   | -                    | -                       |

**Figure S1.** Genetic data for family 890. Pedigree, linkage analysis, and final variant table.

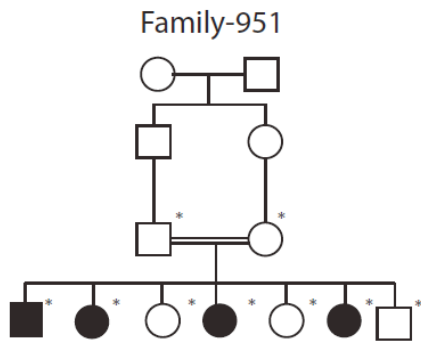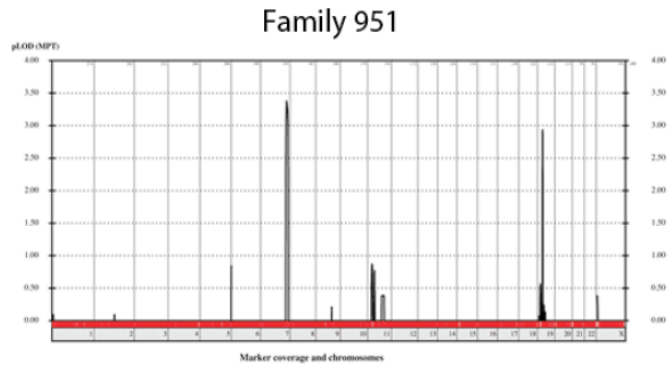

| Chr | Position | RefNT | AltNT | AA Change | Prediction | Conserv | Gene   | Gene Description                    | Segregates in Family | Present in 200 Controls |
|-----|----------|-------|-------|-----------|------------|---------|--------|-------------------------------------|----------------------|-------------------------|
| 19  | 12760995 | C     | T     | p.W695*   | DAMAGING   | 4.48    | MAN2B1 | Mannosidase alpha class 2B member 1 | Yes                  | No                      |

**Figure S2.** Genetic data for family 951. Pedigree, linkage analysis, and final variant table.

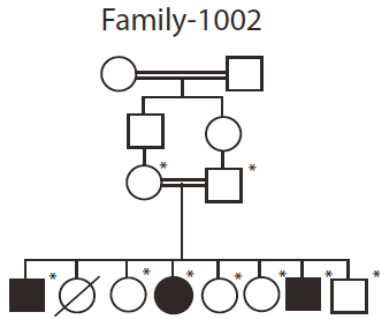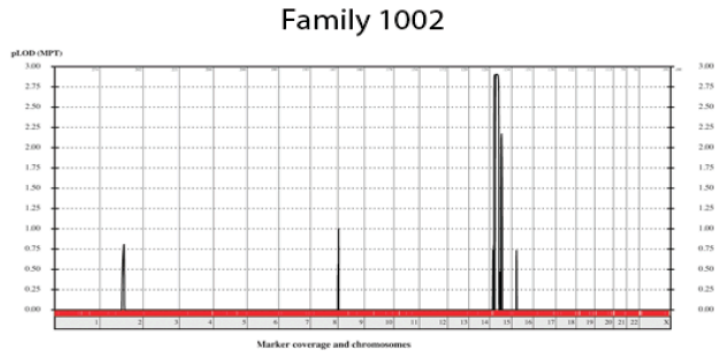

| Chr | Position | RefNT | AltNT | AA Change | Prediction | Conserv | Gene            | Gene Description                    | Segregates in Family | Present in 200 Controls |
|-----|----------|-------|-------|-----------|------------|---------|-----------------|-------------------------------------|----------------------|-------------------------|
| 15  | 44877868 | G     | C     | p.A1696G  | DAMAGING   | 5.07    | <i>SPG11</i>    | Spataccin                           | Yes                  | No                      |
| 15  | 45258358 | T     | G     | splice    | TOLERATED  | 3.83    | <i>C15orf43</i> | Uncharacterized protein<br>C15orf43 | Yes                  | Yes                     |
| 15  | 45412435 | G     | A     | p.T213M   | DAMAGING   | 4.57    | <i>DUOXA1</i>   | Dual oxidase maturation factor 1    | Yes                  | Yes                     |

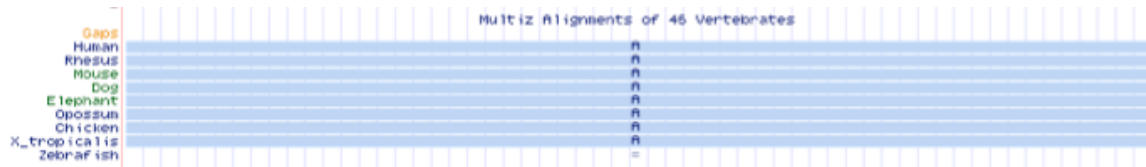

**Figure S3.** Genetic data for family 1002. Pedigree, linkage analysis, final variant table, and conservation figure for *SPG11* residue 1696. A1696 is conserved in vertebrates

Family-1004

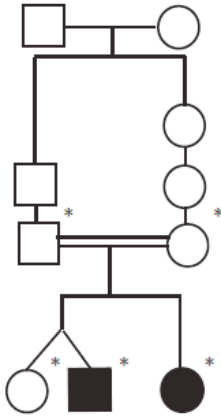

Family 1004

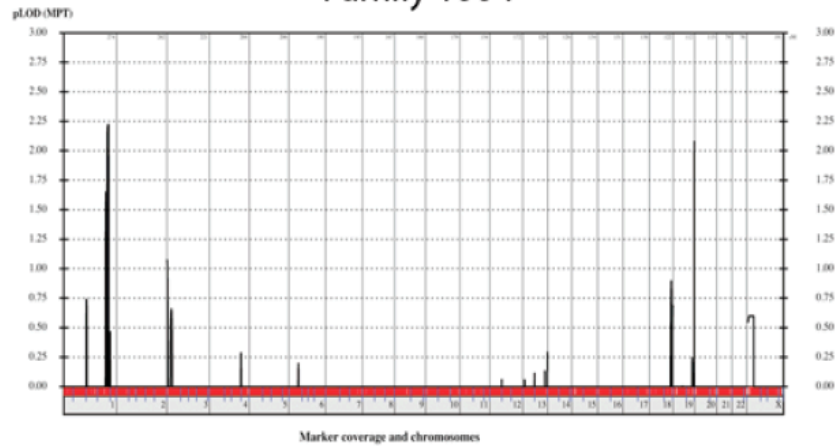

| Chr | Position  | RefNT | AltNT | AA Change | Prediction | Conserv | Gene        | Gene Description     | Segregates in Family | Present in 200 Controls |
|-----|-----------|-------|-------|-----------|------------|---------|-------------|----------------------|----------------------|-------------------------|
| 1   | 228345562 | C     | T     | p.R35C    | DAMAGING   | 3.76    | <i>GJC2</i> | Gap junction gamma-2 | Yes                  | No                      |

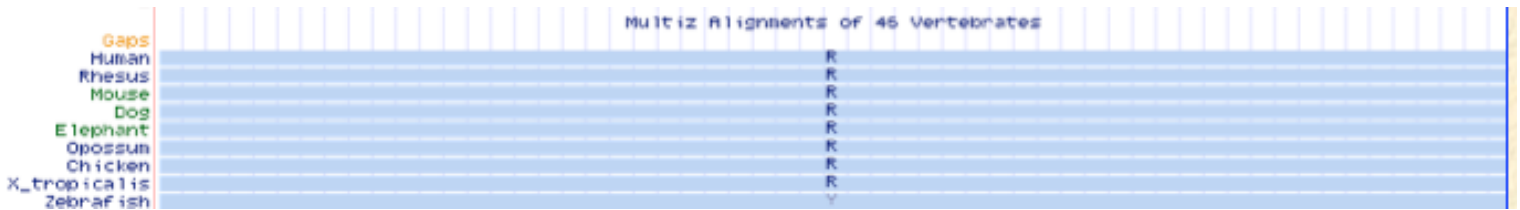

**Figure S4.** Genetic data for family 1004. Pedigree, linkage analysis, final variant table, and conservation figure for *GJC2* residue 35. R35 is conserved to *Xenopus* in vertebrates.

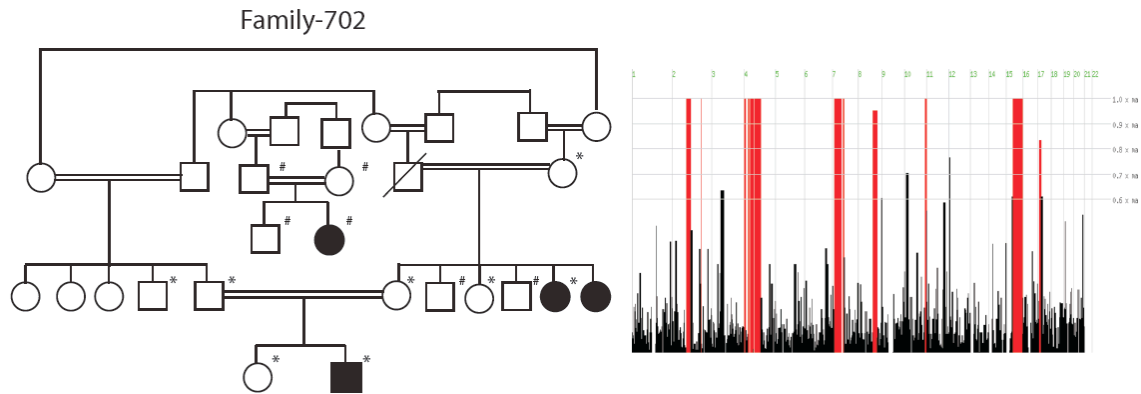

| Chr | Position  | RefNT | AltNT | AA Change | Prediction | Conserv | Gene           | Gene Description                                   | Segregates in Family | Present in 200 Controls |
|-----|-----------|-------|-------|-----------|------------|---------|----------------|----------------------------------------------------|----------------------|-------------------------|
| 8   | 100589861 | G     | T     | splice    | Damaging   | 5.4     | <i>VPS13B</i>  | Vacuolar protein sorting-associated protein 13B    | Yes                  | No                      |
| 7   | 20795056  | C     | T     | p.Q1195*  | Unknown    | 3.97    | <i>ABCB5</i>   | ATP-binding cassette sub-family B member 5         | No                   | -                       |
| 7   | 66274027  | A     | G     | p.Y411C   | Tolerated  | 5.82    | <i>RABGEF1</i> | Rab5 GDP/GTP exchange factor                       | -                    | -                       |
| 15  | 77471939  | G     | A     | p.P777L   | Damaging   | 5.54    | <i>SGK269</i>  | NKF3 kinase family member                          | -                    | -                       |
| 15  | 40751721  | C     | T     | p.S353L   | Tolerated  | 5.5     | <i>BAHD1</i>   | Bromo adjacent homology domain-containing 1        | -                    | -                       |
| 2   | 113496452 | C     | T     | p.R729H   | Damaging   | 5.5     | <i>CKAP2L</i>  | Cytoskeleton-associated protein 2-like             | -                    | -                       |
| 4   | 55127448  | G     | A     | p.G79D    | Damaging   | 5.5     | <i>PDGFRA</i>  | Alpha-type platelet-derived growth factor receptor | -                    | -                       |
| 4   | 57314612  | C     | G     | p.S141C   | Tolerated  | 5.48    | <i>PAICS</i>   | Multifunctional protein ADE2                       | -                    | -                       |
| 2   | 25042941  | G     | A     | p.R1099C  | Damaging   | 5.2     | <i>ADCY3</i>   | Adenylate cyclase type 3                           | -                    | -                       |
| 6   | 7395350   | G     | A     | p.R114Q   | Unknown    | 5.2     | <i>RIOK1</i>   | RIO kinase 1                                       | -                    | -                       |
| 1   | 237058743 | G     | A     | p.R1164H  | Tolerated  | 5.14    | <i>MTR</i>     | Methionine synthase                                | -                    | -                       |
| 4   | 87684148  | G     | T     | p.W1255C  | Tolerated  | 5.1     | <i>PTPN13</i>  | Tyrosine-protein phosphatase non-receptor type 13  | -                    | -                       |
| 15  | 75897537  | T     | C     | p.K211R   | Tolerated  | 5.04    | <i>SNUPN</i>   | Snurportin-1                                       | -                    | -                       |
| 4   | 71472164  | T     | C     | p.L354P   | Tolerated  | 5.03    | <i>AMBN</i>    | Ameloblastin Precursor                             | -                    | -                       |
| 7   | 33976935  | C     | T     | p.P85L    | Tolerated  | 4.83    | <i>BMPER</i>   | BMP-binding endothelial regulator protein          | -                    | -                       |
| 1   | 236645609 | C     | T     | p.S93F    | Tolerated  | 4.76    | <i>EDARADD</i> | Ectodysplasin-A receptor-associated adapter        | -                    | -                       |
| 15  | 67457698  | A     | G     | p.I65V    | Tolerated  | 4.6     | <i>SMAD3</i>   | Mothers against decapentaplegic homolog 3          | -                    | -                       |
| 15  | 74174064  | G     | A     | p.R83Q    | Tolerated  | 4.57    | <i>TBC1D21</i> | TBC1 domain family member 21                       | -                    | -                       |
| 4   | 944254    | G     | A     | p.V80I    | Tolerated  | 4.55    | <i>TMEM175</i> | Transmembrane protein 175                          | -                    | -                       |
| 2   | 105961794 | C     | T     | p.A222V   | Tolerated  | 4.47    | <i>C2orf49</i> | Ashwin                                             | -                    | -                       |

**Figure S5.** Genetic data for family 702. Pedigree, homozygosity analysis, and final variant table.

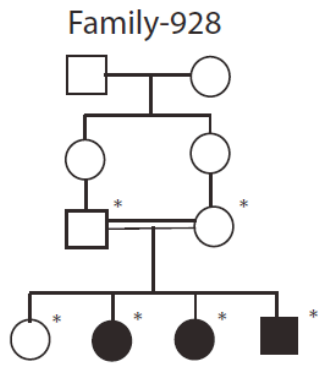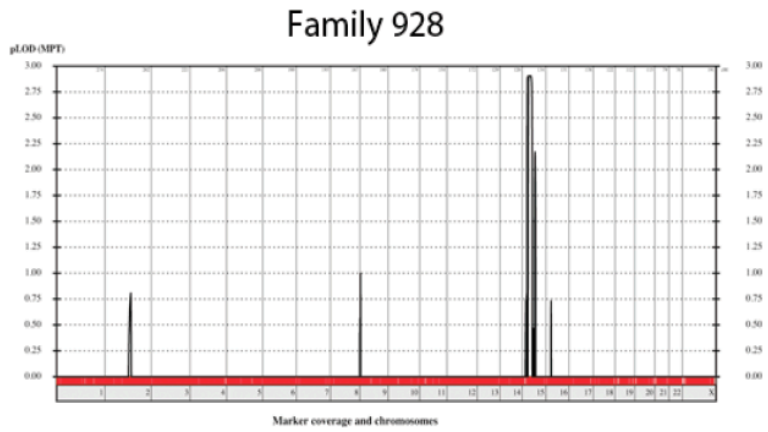

| Chr | Position  | RefNT | AltNT | AA Change | Prediction | Conserv | Gene    | Gene Description                              | Segregates in Family | Present in 200 Controls |
|-----|-----------|-------|-------|-----------|------------|---------|---------|-----------------------------------------------|----------------------|-------------------------|
| 2   | 202572665 | CAG   | C     | p.144fs   | DAMAGING   | N/A     | ALS2    | Alsin                                         | Yes                  | No                      |
| 2   | 201515700 | C     | T     | splice    | N/A        | 4.02    | AOX1    | Aldehyde oxidase                              | No                   | -                       |
| 2   | 203765756 | T     | C     | p.I75V    | TOLERATED  | 4.35    | WDR12   | Ribosome biogenesis protein WDR12             | No                   | -                       |
| 2   | 203846817 | A     | T     | p.Y571F   | TOLERATED  | 4.12    | ALS2CR8 | Amyotrophic lateral sclerosis 2 region gene 8 | No                   | -                       |
| 2   | 219029339 | C     | T     | p.R199Q   | DAMAGING   | 4.51    | CXCR1   | Chemokine CXC motif receptor 1                | No                   | -                       |
| 2   | 219507166 | G     | A     | p.A1358V  | TOLERATED  | 3.57    | ZNF142  | Zinc finger protein 142                       | No                   | -                       |
| 20  | 60887356  | G     | A     | p.T3126I  | TOLERATED  | 4.01    | LAMA5   | Laminin subunit alpha-5                       | No                   | -                       |

**Figure S6.** Genetic data for family 928. Pedigree, linkage analysis, and final variant table.

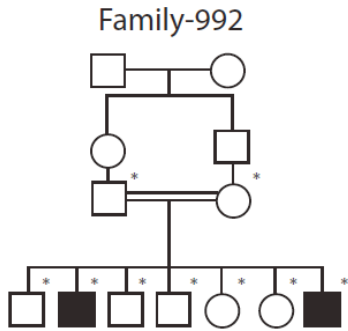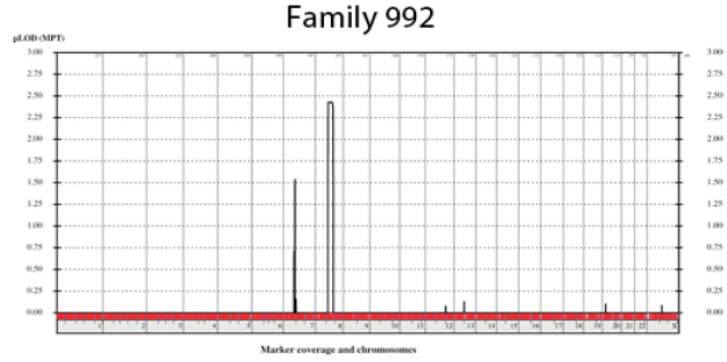

| Chr | Position   | RefNT | AltNT | AA Change | Prediction | Conserv | Gene          | Gene Description                        | Segregates in Family | Present in 200 Controls |
|-----|------------|-------|-------|-----------|------------|---------|---------------|-----------------------------------------|----------------------|-------------------------|
| 8   | 1001233409 | G     | T     | p.E222*   | DAMAGING   | 4.88    | <i>VSP13B</i> | Vacuolar protein sorting associated 13B | Yes                  | No                      |
| 8   | 94793190   | A     | T     | p.S239C   | DAMAGING   | 5.49    | <i>TMEM67</i> | Meckelin                                | No                   | -                       |
| 8   | 94784818   | G     | C     | splice    | TOLERATED  | 5.24    | <i>TMEM67</i> | Meckelin                                | No                   | -                       |
| 8   | 98656966   | G     | T     | p.A78S    | TOLERATED  | 5.01    | <i>MTDH</i>   | Protein LYRIC, metadherin               | No                   | -                       |

**Figure S7.** Genetic data for family 992. Pedigree, linkage analysis, and final variant table.



Family-995

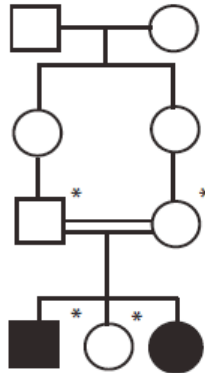

Family 995

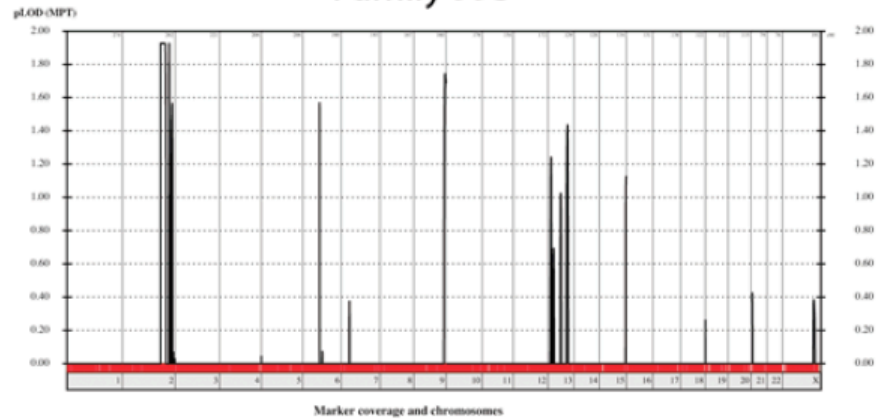

| Chr | Position  | RefNT | AltNT | AA Change | Prediction | Conserv | Gene          | Gene Description                    | Segregates in Family | Present in 200 Controls |
|-----|-----------|-------|-------|-----------|------------|---------|---------------|-------------------------------------|----------------------|-------------------------|
| 2   | 202626188 | C     | A     | p.G177C   | DAMAGING   | 5.47    | <i>ALS2</i>   | Alsin                               | Yes                  | No                      |
| 2   | 196748512 | T     | C     | p.I1854V  | TOLERATED  | 5.68    | <i>DNAH7</i>  | Dyein heavy chain 7, axonemal       | No                   | -                       |
| 2   | 213921685 | T     | C     | p.N93S    | TOLERATED  | 4.74    | <i>IKZF2</i>  | Zinc finger protein Helios          | No                   | -                       |
| 2   | 214160817 | G     | A     | p.D56N    | TOLERATED  | 5.1     | <i>SPAG16</i> | Sperm-associated antigen 16 protein | No                   | -                       |
| 2   | 214354811 | G     | A     | p.S356N   | DAMAGING   | 4.78    | <i>SPAG16</i> | Sperm-associated antigen 16 protein | No                   | -                       |
| 2   | 28472253  | T     | C     | p.D161G   | NOT SCORED | 4.26    | <i>GPX6</i>   | Glutathione peroxidase 6            | No                   | -                       |
| 2   | 29012712  | T     | C     | p.M81V    | TOLERATED  | 3.02    | <i>OR2W1</i>  | Olfactory receptor 2W1              | No                   | -                       |
| 2   | 32024395  | C     | T     | p.R2704H  | TOLERATED  | 3.62    | <i>TNXB</i>   | Putative tenascin-XA                | No                   | -                       |
| 2   | 33243751  | G     | C     | p.V67L    | TOLERATED  | 4.85    | <i>RPS18</i>  | 40S ribosomal protein S18           | No                   | -                       |
| 15  | 75117912  | G     | T     | p.R516M   | TOLERATED  | 3.77    | <i>LMAN1L</i> | Protein ERGIC-53-like precursor     | No                   | -                       |

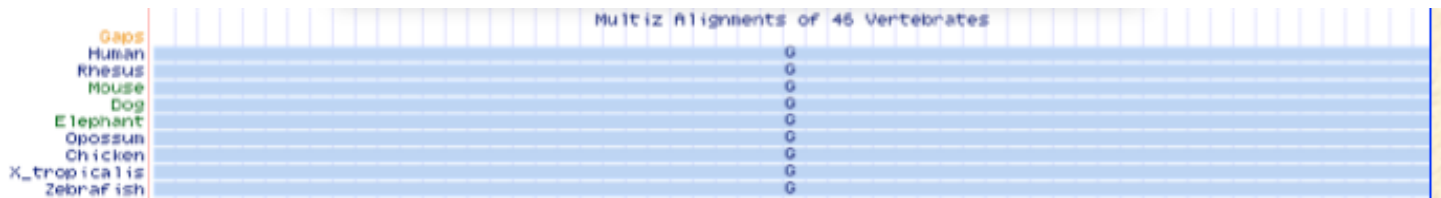

**Figure S8.** Genetic data for family 995. Pedigree, linkage analysis, final variant table, and conservation figure for *ALS2* residue 177. G177 is conserved in vertebrates.

Family-1409

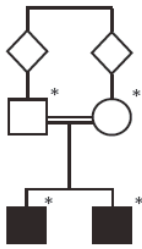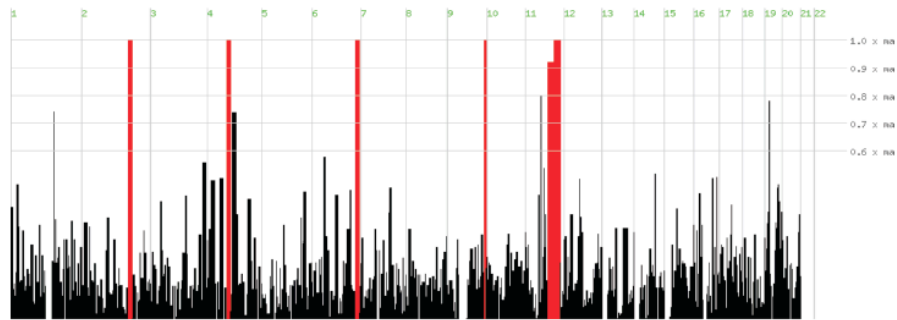

| Chr | Position  | RefNT | AltNT | AA Change | Prediction | Conserv | Gene            | Gene Description                             | Segregates in Family | Present in 200 Controls |
|-----|-----------|-------|-------|-----------|------------|---------|-----------------|----------------------------------------------|----------------------|-------------------------|
| 9   | 136218932 | G     | A     | p.Q273*   | UNKNOWN    | 5.04    | <i>SURF1</i>    | Surfeit locus protein 1                      | Yes                  | No                      |
| 4   | 40103817  | G     | A     | p.E118K   | TOLERATED  | 5.73    | <i>N4BP2</i>    | NEDD4 binding protein 2                      | No                   | -                       |
| 4   | 40123790  | T     | G     | p.S1353R  | TOLERATED  | 5.61    | <i>N4BP2</i>    | NEDD4 binding protein 2                      | No                   | -                       |
| 17  | 1551223   | C     | T     | p.G284S   | TOLERATED  | 4.99    | <i>RILP</i>     | RAB interacting lysosomal protein            | No                   | -                       |
| 9   | 136305530 | C     | T     | p.P618A   | DAMAGING   | 4.77    | <i>ADAMTS13</i> | A disintegrin and metalloproteinase motif 13 | -                    | -                       |
| X   | 23731321  | T     | C     | splice    | TOLERATED  | 4.26    | <i>ACOT9</i>    | Acyl-coenzyme A thioesterase 9               | No                   | -                       |
| X   | 16859867  | C     | T     | p.P390L   | TOLERATED  | 4.21    | <i>TXLNG</i>    | Gamma-taxillin                               | -                    | -                       |
| 6   | 161152819 | C     | T     | p.A494V   | TOLERATED  | 4.12    | <i>PLG</i>      | Plasminogen precursor                        | -                    | -                       |
| 6   | 159188474 | G     | A     | p.P472L   | TOLERATED  | 3.83    | <i>EZR</i>      | Ezrin                                        | -                    | -                       |
| 11  | 65318751  | G     | A     | p.A438V   | DAMAGING   | 3.64    | <i>LTBP3</i>    | Latent transforming growth factor beta 3     | -                    | -                       |
| 9   | 133936490 | A     | G     | p.N743D   | TOLERATED  | 3.62    | <i>LAMC3</i>    | Laminin subunit gamma 3                      | -                    | -                       |

**Figure S9.** Genetic data for family 1409. Pedigree, homozygosity analysis, and final variant table.

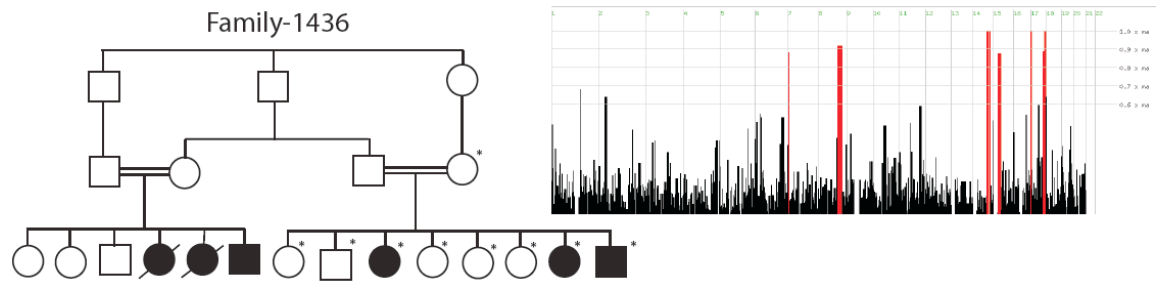

| Chr | Position | RefNT | AltNT | AA Change | Prediction | Conserv | Gene          | Gene Description                        | Segregates in Family | Present in 200 Controls |
|-----|----------|-------|-------|-----------|------------|---------|---------------|-----------------------------------------|----------------------|-------------------------|
| 14  | 77743795 | C     | T     | p.G726E   | DAMAGING   | 5.12    | <i>POMT2</i>  | Protein O-mannosyl-transferase 2        | Yes                  | No                      |
| 8   | 99142224 | C     | G     | p.Q169E   | TOLERATED  | 4.86    | <i>POP1</i>   | Ribonuclease P/MRP protein subunit POP1 | No                   | -                       |
| 14  | 77275486 | G     | A     | p.P189S   | TOLERATED  | 3.52    | <i>ANGEL1</i> | Protein angel homolog 1                 | No                   | -                       |
| 17  | 74208560 | C     | T     | splice    | N/A        | N/A     | <i>RNF157</i> | RING finger protein 157                 | No                   | -                       |

**Figure S10.** Genetic data for family 1436. Pedigree, homozygosity analysis, and final variant table.

|                                                        | Dominant or de novo       | Recessive without consanguinity   | Recessive with consanguinity |
|--------------------------------------------------------|---------------------------|-----------------------------------|------------------------------|
| Total variants                                         | 26K +/- 2K                | 26K +/- 2K                        | 26K +/- 2K                   |
| Exonic and splice variants                             | 19K +/- 3K                | 19K +/- 3K                        | 19K +/- 3K                   |
| Non-synonymous +Splice + INDELS                        | 10K +/- 2K                | 10K +/- 2K                        | 10K +/- 2K                   |
| Variant either not present or rare (<1:300) in dbSNP   | 400 +/- 200               | 400 +/- 200                       | 400 +/- 200                  |
| Variants not present in our in-house database (unique) | 150 +/- 50                | 150 +/- 50                        | 150 +/- 50                   |
| Compatible with inheritance model                      | Heterozygous<br>85 +/- 30 | Compound Heterozygous<br>10 +/- 5 | Homozygous<br>5 +/- 4        |
| Segregates in family                                   | 40 +/- 20                 | 5 +/- 5                           | 1 +/- 2                      |

Exome sequencing generally produces 26,000 +/- 2000 (26K +/- 5K) variants across the genome from a single individual, irrespective of the mode of disease. Filtering those that do not occur in exons or at potential splice sites leaves 19K +/- 3K, then filtering for those that are not non-synonymous, at splice sites, or produce insertion/deletion polymorphisms (INDELS) leaves 10K +/- 2K. Further filtering of variants reported in the public databases at rates over that expected from Hardy-Weinberg equilibrium (i.e. >1:300) leaves 400 +/- 200. Filtering non-unique variants from our in-house variant database leaves 150 +/- 50 variants to consider. At this point, the mode of inheritance becomes paramount in isolating the disease-causing gene. Specifically, a recessive disease from a consanguineous family should result from a homozygous mutation that segregates in the family as a recessive trait. On average 5 +/- 4 variants will meet this criterion and only 1 +/- 2 variants will actually segregate in the family. For these reasons, identifying disease-causing genetic mutations is more robust in consanguineous families with recessive disease (data compiled from published literature and personal experience).

**Table S1.** Estimated variants to be considered as causative from WES are greatly reduced in recessive disease with documented consanguinity.

| Family | Exome coverage | Total variants | #Coding, Splice variants | #Non-synonymous variants | #Homozygous recessive variants | #Variants absent or rare in dbSNP | #Variants not present in-house database | #Variants in linkage intervals | Type of variants                      | #Variants conserved across evolution | #Predicted damaging variants |
|--------|----------------|----------------|--------------------------|--------------------------|--------------------------------|-----------------------------------|-----------------------------------------|--------------------------------|---------------------------------------|--------------------------------------|------------------------------|
| 890    | 94.7%          | 21,693         | 14,451                   | 7,757                    | 2,961                          | 79                                | 33                                      | 7                              | 1 deletion<br>6 missense              | 1                                    | 1                            |
| 951    | 96.9%          | 27,112         | 20,607                   | 10,610                   | 3,374                          | 91                                | 26                                      | 10                             | 1 nonsense<br>9 missense              | 2                                    | 2                            |
| 1002   | 97.4%          | 26,119         | 17,553                   | 10,286                   | 3,371                          | 96                                | 37                                      | 8                              | 1 splice<br>2 missense                | 2                                    | 1                            |
| 1004   | 97.1%          | 26,932         | 18,653                   | 10,809                   | 3,197                          | 83                                | 17                                      | 5                              | 5 missense                            | 3                                    | 2                            |
| 702    | 97.2%          | 27,454         | 18,795                   | 11,515                   | 3,522                          | 112                               | 37                                      | 21                             | 1 nonsense<br>2 splice<br>18 missense | 10                                   | 5                            |
| 928    | 97.2%          | 27,423         | 19,853                   | 10,598                   | 3,123                          | 78                                | 15                                      | 7                              | 1 nonsense<br>1 splice<br>5 missense  | 1                                    | 1                            |
| 992    | 97.2%          | 27,155         | 17,814                   | 10,892                   | 3,287                          | 75                                | 19                                      | 4                              | 1 nonsense<br>1 splice<br>2 missense  | 4                                    | 1                            |
| 995    | 96.9%          | 27,748         | 19,605                   | 10,983                   | 3,310                          | 101                               | 15                                      | 10                             | 10 missense                           | 3                                    | 1                            |
| 1409   | 97.2%          | 26,426         | 18,683                   | 10,356                   | 3,236                          | 85                                | 26                                      | 11                             | 1 nonsense<br>1 splice<br>9 missense  | 3                                    | 1                            |
| 1436   | 95.4%          | 25,864         | 23,334                   | 9,661                    | 3,022                          | 78                                | 18                                      | 4                              | 1 splice<br>3 missense                | 2                                    | 1                            |

On average, the total number of variants identified per family was 26K. Approximately 19K of those were found in coding and splice regions. Approximately 10K of the 19K were found to be non-synonymous missense, splice or deletion/insertion polymorphisms. The remaining ~10K variants could then be further filtered down by the number of homozygous variants, the number absent or rare in dbSNP or in our in-house databases, and the number found in linkage intervals. The remaining variants were then prioritized based on type of mutation, conservation of the affected amino acids or base pairs across species, and predicted damage to the protein.

**Table S2.** Number of variants identified in each family at each step of the variant filtering and prioritization pipeline.
